# Supplementary material for: High-throughput solubility measurements of polymer libraries in supercritical carbon dioxide
Source: Royal Society of Chemistry journal article supplement (doi:10.1039/b415343j), 2004-11-24
Supplement: b415343j.pdf [file b415343j.pdf]

**High-Throughput Solubility Measurements  
in Supercritical Carbon Dioxide**

**Christopher L. Bray, Bien Tan, Colin D. Wood, and Andrew I. Cooper\***

\* Department of Chemistry, University of Liverpool, L69 7ZD, Liverpool,  
United Kingdom. E-mail: [aicooper@liv.ac.uk](mailto:aicooper@liv.ac.uk)

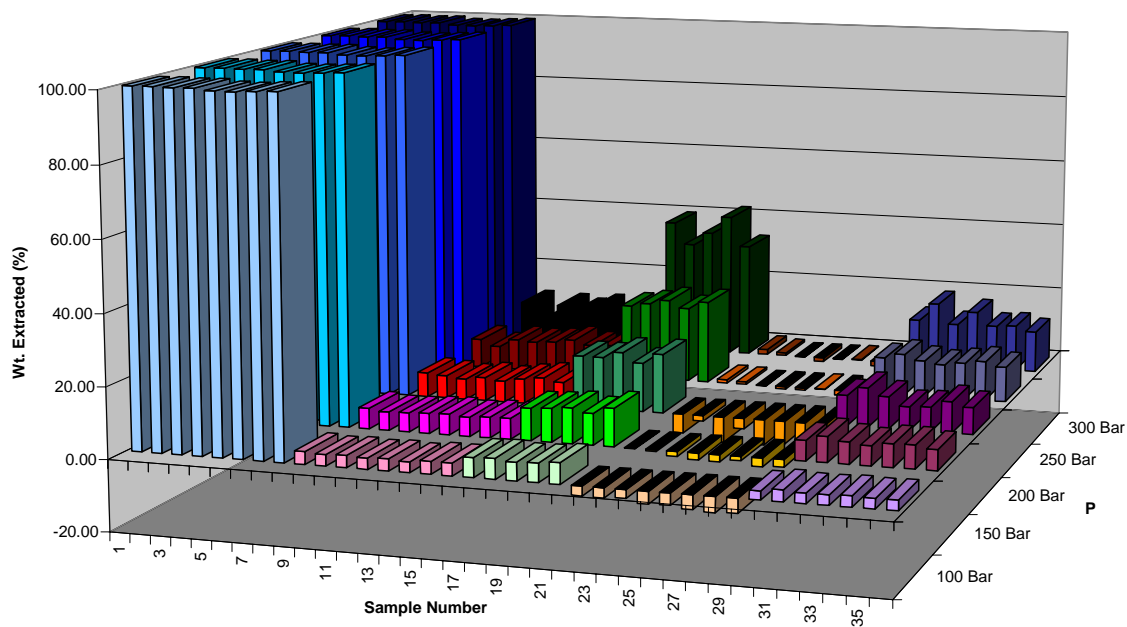

**Figure S1:** Reproducibility studies for HT solubility measurements in scCO<sub>2</sub>. Sample-to-sample standard deviation in wt % extracted = 1.5–10 %.

Blue bars (left) = AIBN (8 replicates)

Pink/red bars = poly(vinyl stearate),  $M_w = 90,000$  g/mol (8 replicates)

Green bars = poly(vinyl acetate),  $M_w = 12,500$  g/mol (5 replicates)

Orange bars = poly(propylene carbonate),  $M_n = 50,000$  g/mol (8 replicates)

Purple bars (right) = poly(3-methyl-1,5-pentan-3-methyl-glutarate),  $M_w = 4700$  g/mol (7 replicates)

**Note:** Poly(propylene carbonate) shows a “negative” mass loss because this polymer absorbs significant quantities of CO<sub>2</sub> which are lost only slowly (periods of hours) after the samples are removed from the extraction vessel.

Thar Automated  
Back Pressure  
Regulator

Co-solvent  
Pump

Thar P-50 HP  
Pump

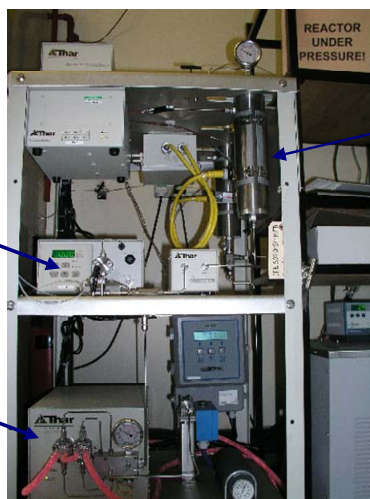

500 ml extraction vessel

Thar SFE-50 SFE

**Figure S2:** Photograph of equipment used for HT solubility measurements in scCO<sub>2</sub>
